# Supplementary material
Source: Springer Nature journal article supplement (https://www.springermedizin.de/resource/supplementary/12913_2011_2126_MOESM2_ESM.pdf/9529746)

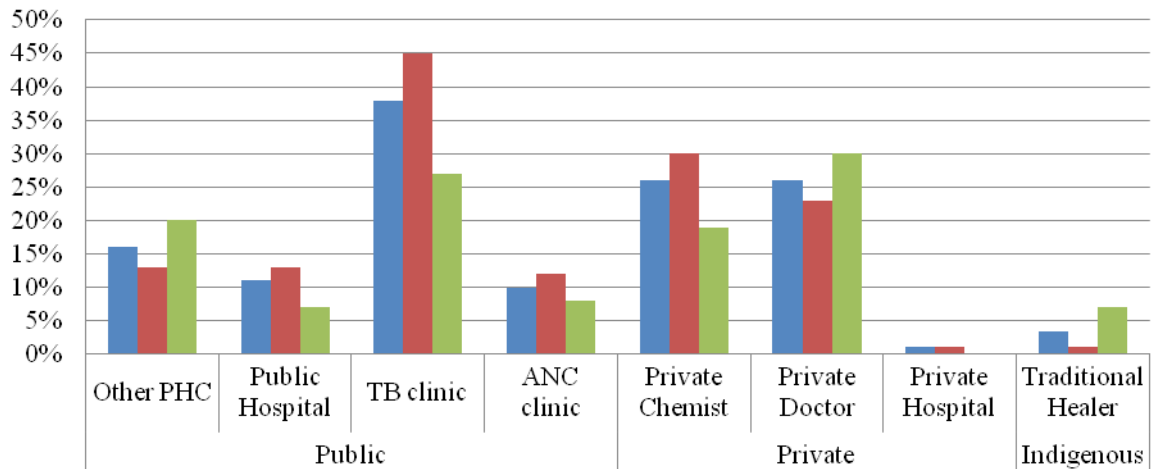

|         |     |     |     |     |     |     |    |    |
|---------|-----|-----|-----|-----|-----|-----|----|----|
| ■ Total | 16% | 11% | 38% | 10% | 26% | 26% | 1% | 3% |
| ■ Urban | 13% | 13% | 45% | 12% | 30% | 23% | 1% | 1% |
| ■ Rural | 20% | 7%  | 27% | 8%  | 19% | 30% | 0% | 7% |

Supplement: MOESM2 [file 9529746]
